# Supplementary material for: The Application of Pipette-Tip and Magnetic Dummy-Template Molecularly Imprinted Solid-Phase Extraction Coupled with High-Performance Liquid Chromatography with Diode Array and Spectrofluorimetric Detection for the Determination of Coumarins in Cosmetic Samples
Source: MDPI journal article supplement (doi:10.3390/pr12030582), 2024-03-14
Supplement: s1 [file s1]

## SUPPLEMENTARY MATERIAL

### **The Application of Pipette-Tip and Magnetic Dummy-Template Molecularly Imprinted Solid-Phase Extraction Coupled with High-Performance Liquid Chromatography with Diode Array and Spectrofluorimetric Detection for the Determination of Coumarins in Cosmetic Samples**

**Andrea Špačková<sup>1</sup>, Katarína Hroboňová<sup>1,\*</sup>, Michal Jablonský<sup>2,\*</sup>**

*<sup>1</sup>Institute of Analytical Chemistry, Faculty of Chemical and Food Technology, Slovak  
University of Technology in Bratislava, Radlinského 9, SK-812 37 Bratislava, Slovakia;  
andrea.spackova@stuba.s*

*<sup>2</sup>Department of Wood, Pulp and Paper, Faculty of Chemical and Food Technology,  
Slovak University of Technology in Bratislava, Radlinského 9, SK-812 37 Bratislava, Slovakia*

\* Correspondence:

Assoc. Prof. Michal Jablonský, PhD.; michal.jablonský@stuba.sk

Assoc. Prof. Katarína Hroboňová, PhD.; katarina.hrobonova@stuba.sk

**Table S1.** Applications of MIP-based extractions as sample pre-treatment methods in cosmetics analysis

| Analyte                                        | Template /<br>Monomer /<br>Cross-linker                   | MIP preparation                                             | Sample matrix/<br>Mode of MIP extraction                                   | Recovery<br>(%)          | Analytical<br>method   | LOD                                                                                    | Ref. |
|------------------------------------------------|-----------------------------------------------------------|-------------------------------------------------------------|----------------------------------------------------------------------------|--------------------------|------------------------|----------------------------------------------------------------------------------------|------|
| Prednisone                                     | Prednisone /<br>APTES/TEOS                                | Surface imprinting on<br>MWCNTs                             | Cream/<br>SPE(MIP-MWCNTs)                                                  | 83-106                   | HPLC-UV                | $5 \times 10^{-3} \mu\text{g.mL}^{-1}$                                                 | 27   |
| Bisphenol A                                    | Bisphenol A /<br>APTES/TEOS                               | MIP layer-coated silica<br>nanoparticles                    | Shampoo, Bath lotion, Cream/<br>MISPE                                      | 87-97                    | HPLC-UV/FL             | $1 \times 10^{-6} \mu\text{mol.mL}^{-1}$                                               | 28   |
| Benzylparaben                                  | Benzylparaben /<br>MAA/EGDMA                              | Surface imprinting on silica<br>particles                   | Sunscreen cream/<br>On-line MISPE                                          | 99                       | HPLC-UV                | $3.34 \times 10^{-3} \mu\text{g.mL}^{-1}$                                              | 29   |
| Metronidazole                                  | Metronidazole /<br>MAA/EGMRA                              | Surface imprinting on magnetic<br>particles                 | Toner, Powder, Cream/<br>MMIP                                              | 84-100                   | HPLC-UV                | $3 \times 10^{-3} \mu\text{g.mL}^{-1}$                                                 | 30   |
| o-hydroxybenzoic acid                          | o-Hydroxybenzoic<br>acid /<br>APTES/TEOS                  | Surface imprinting on the<br>carrier by the sol-gel process | Cosmetics (unspecified type)/<br>MISPE                                     | 87 - 105                 | HPLC-UV                | -                                                                                      | 31   |
| Triclosan                                      | Triclosan /<br>AA+MMA/<br>DVB+TRIM                        | Precipitation polymerization                                | Toothpaste/<br>MIP based sensor (ISE)                                      | 96 - 106                 | Potentiometry          | $1.9 \times 10^{-6} \mu\text{mol.mL}^{-1}$                                             | 32   |
| Dexamethasone                                  | Dexamethasone /<br>MAA/EGDMA                              | Surface imprinting on magnetic<br>particles                 | Cosmetics (unspecified type)/<br>MSPE                                      | 94 – 99                  | HPLC-UV                | $0.05 \mu\text{g.mL}^{-1}$                                                             | 33   |
| Bupivacaine<br>Benzocaine<br>Lidocaine         | Bupivacaine /<br>MAA/EGDMA                                | Bulk polymerization, packed<br>into a hollow fiber          | Body lotion/<br>HF- $\mu$ SPE                                              | 99 – 99                  | GC-MS                  | $0.01 \mu\text{g.mL}^{-1}$<br>$0.04 \mu\text{g.mL}^{-1}$<br>$0.01 \mu\text{g.mL}^{-1}$ | 34   |
| Methylparaben<br>Thylparaben<br>Propylparaben  | Methylparaben /<br>chitosan / sulfuric<br>acid            | Precipitation polymerization                                | Powder sunscreen/<br>MIP-MSPD                                              | 91-103                   | HPLC-UV                | $0.04\text{-}10 \mu\text{g.g}^{-1}$                                                    | 35   |
| Kojic acid                                     | Kojic acid /<br>APTES/TEOS                                | Surface imprinting on magnetic<br>particles                 | Serum, Cream, Lotion/<br>MSPE                                              | 92-105                   | UV-VIS<br>spectrometry | $0.021 \mu\text{g.mL}^{-1}$                                                            | 36   |
| Metylparaben,<br>Ethylparaben<br>Propylparaben | Propylparaben /<br>DES (Choline<br>chloride-MAA)/<br>TRIM | Surface imprinting on magnetic<br>particles                 | Shampoo, Deodorant<br>Face cleanser<br>Moisturizer, Lotion, Toner/<br>MSPE | 44-65<br>52-64<br>76-113 | UV-VIS<br>spectrometry | $0.03\text{-}0.5 \mu\text{g.mL}^{-1}$                                                  | 37   |

AA- acrylamide; APTES- 3-aminopropyltriethoxysilane; DES- Deep eutectic solvent; DVB- divinylbenzene; EGDMA- ethylene glycol dimethacrylate; EGMRA- ethylene glycol maleic rosinat acrylate; GC-MS- gas chromatography with mass spectrometry; HF- $\mu$ SPE- hollow fiber micro-SPE; HPLC-UV- high performance liquid chromatography with UV spectrophotometric detection; ISE- ion-selective electrode; MAA- methacrylic acid; MMA- methyl methacrylate; MIP- molecularly imprinted polymer; MISPE- solid phase extraction with MIP adsorbent; MSPD- matrix solid-phase dispersion; MSPE- solid phase magnetic extraction; MWCNTs- multi-walled carbon nanotubes; TEOS- triethoxysilane; TRIM- trimethylolpropane trimethacrylate.
